# Supplementary material for: Surgically Treated Hind-Limb Fibromyxochondroma in a Cranwell’s Horned Frog (Ceratophrys cranwelli)
Source: MDPI journal article supplement (doi:10.3390/pets1010003), 2024-04-09
Supplement: s1 [file s1]

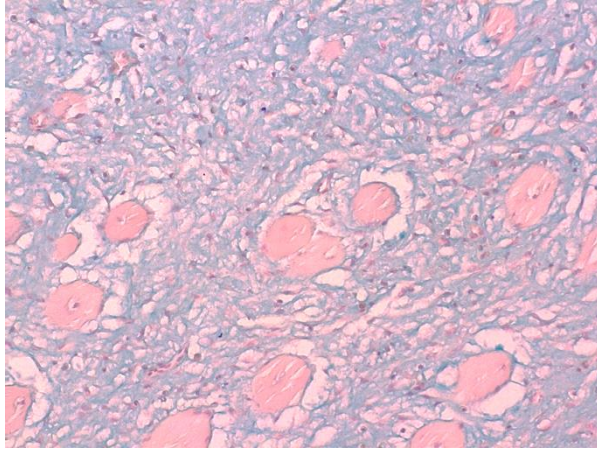

**Figure S1.** Histological section (200× magnification). Detail of neoplastic cells infiltrating myofiber showing myxoid material in Alcian Blue staining.
